# Supplementary material
Source: publisher figshare collection journal article supplement (https://gsajournals.figshare.com/ndownloader/files/22658414)
Supplement: Supplementary file 1 [file 22658414]

Archive with 1 entries (1 files):
- 22658414.out
